# Supplementary material for: Relation between Methylmercury Exposure and Plasma Paraoxonase Activity in Inuit Adults from Nunavik
Source: PubMed Central journal article supplement (PMC3237359; doi:10.1289/ehp.1003296), 2011-05-04
Supplement: ehp.1003296.s001.pdf [file ehp.1003296.s001.pdf]

Supplemental Material

Relation between Methylmercury Exposure and Plasma Paraoxonase Activity in Inuit Adults from Nunavik

Pierre Ayotte, Antoine Carrier, Nathalie Ouellet, Véronique Boiteau, Belkacem Abdous,  
Elhadji Anassour Laouan Sidi, Marie-Ludivine Château-Degat, and Éric Dewailly

Supplemental Material, Table 1. Beta coefficients and standards errors for independent variables entered in different multiple linear regression models of plasma PON1 activity (log kU/L) in Inuit adults, Nunavik, 2004

| Variables                                           | Model 1<br>N = 651; R <sup>2</sup> = 0.314 <sup>d</sup> | Model 2<br>N = 599; R <sup>2</sup> = 0.308 | Model 3<br>N = 542; R <sup>2</sup> = 0.328 | Model 4<br>N = 651; R <sup>2</sup> = 0.321 | Model 5<br>N = 651; R <sup>2</sup> = 0.319 | Model 6<br>N = 651; R <sup>2</sup> = 0.318 |
|-----------------------------------------------------|---------------------------------------------------------|--------------------------------------------|--------------------------------------------|--------------------------------------------|--------------------------------------------|--------------------------------------------|
| Age (years)                                         | -0.047 (0.010)***                                       | -0.046 (0.010)***                          | -0.042 (0.011)***                          | -0.047 (0.010)***                          | -0.045 (0.010)***                          | -0.045 (0.010)***                          |
| Blood mercury (nmol/L) <sup>a</sup>                 | -0.063 (0.014)***                                       | -0.067 (0.015)***                          | -0.075 (0.014)***                          | -0.043 (0.055)                             | -0.068 (0.014)***                          | -0.070 (0.014)***                          |
| Blood selenium (μmol/L) <sup>b</sup>                | 0.067 (0.011)***                                        | 0.062 (0.012)***                           | 0.058 (0.012)***                           | 0.067 (0.011)***                           | 0.071 (0.012)***                           | 0.068 (0.011)***                           |
| HDL-C (mmol/L) <sup>a</sup>                         | 0.077 (0.008)***                                        | 0.079 (0.009)***                           | 0.073 (0.009)***                           | 0.077 (0.008)***                           | 0.075 (0.008)***                           | 0.076 (0.008)***                           |
| EPA+DHA (%)                                         | 0.048 (0.013)***                                        | 0.040 (0.014)**                            | 0.049 (0.016)**                            | 0.049 (0.013)***                           | 0.049 (0.013)***                           | 0.054 (0.013)***                           |
| Blood lead (μmol/L) <sup>a</sup>                    |                                                         | 0.014 (0.011)                              |                                            |                                            |                                            |                                            |
| Fat mass (kg) <sup>a</sup>                          |                                                         | 0.021 (0.011)*                             |                                            |                                            |                                            |                                            |
| Marine mammal fat consumption (g/day) <sup>a</sup>  |                                                         |                                            | 0.006 (0.009)                              |                                            |                                            |                                            |
| Marine mammal meat consumption (g/day) <sup>a</sup> |                                                         |                                            | 0.010 (0.010)                              |                                            |                                            |                                            |
| Country fish consumption (g/day) <sup>a</sup>       |                                                         |                                            | 0.005 (0.010)                              |                                            |                                            |                                            |
| <u>PON1 variants</u>                                |                                                         |                                            |                                            |                                            |                                            |                                            |
| rs662 (Q192R)                                       |                                                         |                                            |                                            |                                            |                                            |                                            |
| GG                                                  | -0.189 (0.027)***                                       | -0.185 (0.029)***                          | -0.190 (0.030)***                          | -0.187 (0.027)***                          | -0.189 (0.027)***                          | -0.190 (0.027)***                          |
| AG                                                  | -0.101 (0.023)***                                       | -0.100 (0.024)***                          | -0.109 (0.025)***                          | -0.101 (0.023)***                          | -0.100 (0.023)***                          | -0.100 (0.024)***                          |
| rs854560 (L55M) <sup>c</sup>                        |                                                         |                                            |                                            |                                            |                                            |                                            |
| TT                                                  | 0.096 (0.029)**                                         | 0.089 (0.030)**                            | 0.092 (0.031)**                            | 0.109 (0.029)***                           | 0.097 (0.031)**                            | 0.098 (0.029)**                            |
| rs705379 (-108C/T)                                  |                                                         |                                            |                                            |                                            |                                            |                                            |
| GG                                                  | 0.366 (0.044)***                                        | 0.371 (0.043)***                           | 0.390 (0.045)***                           | 0.363 (0.042)***                           | 0.366 (0.044)***                           | 0.367 (0.044)***                           |
| AG                                                  | 0.230 (0.045)***                                        | 0.238 (0.045)***                           | 0.248 (0.047)***                           | 0.229 (0.044)***                           | 0.229 (0.045)***                           | 0.229 (0.045)***                           |
| <u>Interactions</u>                                 |                                                         |                                            |                                            |                                            |                                            |                                            |
| PON1 variants x mercury                             |                                                         |                                            |                                            |                                            |                                            |                                            |
| rs662 (Q192R)                                       |                                                         |                                            |                                            |                                            |                                            |                                            |
| GG                                                  |                                                         |                                            |                                            | -0.006 (0.029)                             |                                            |                                            |
| AG                                                  |                                                         |                                            |                                            | -0.040 (0.024)                             |                                            |                                            |

rs854560 (L55M)<sup>c</sup>

TT

0.030 (0.036)

rs705379 (-108C/T)

GG

-0.030 (0.043)

AG

-0.017 (0.042)

Mercury x selenium

-0.013 (0.008)

Mercury x EPA+DHA

-0.010 (0.008)

---

HDL-C: high-density lipoprotein cholesterol; EPA: eicosapentaenoic acid; DHA: docosahexaenoic acid.

<sup>a</sup> Log transformed variables. <sup>b</sup> Inverse-transformed variable. <sup>c</sup> Reference category is AT&AA. <sup>d</sup> Multiple R-square values.

\* p < 0.05; \*\* p < 0.01; \*\*\* p < 0.001
